# Supplementary material for: Inhibitors of Rho/MRTF/SRF Transcription Pathway Regulate Mitochondrial Function
Source: MDPI journal article supplement (doi:10.3390/cells13050392), 2024-02-24
Supplement: s1 [file s1]

## Supplementary Figures

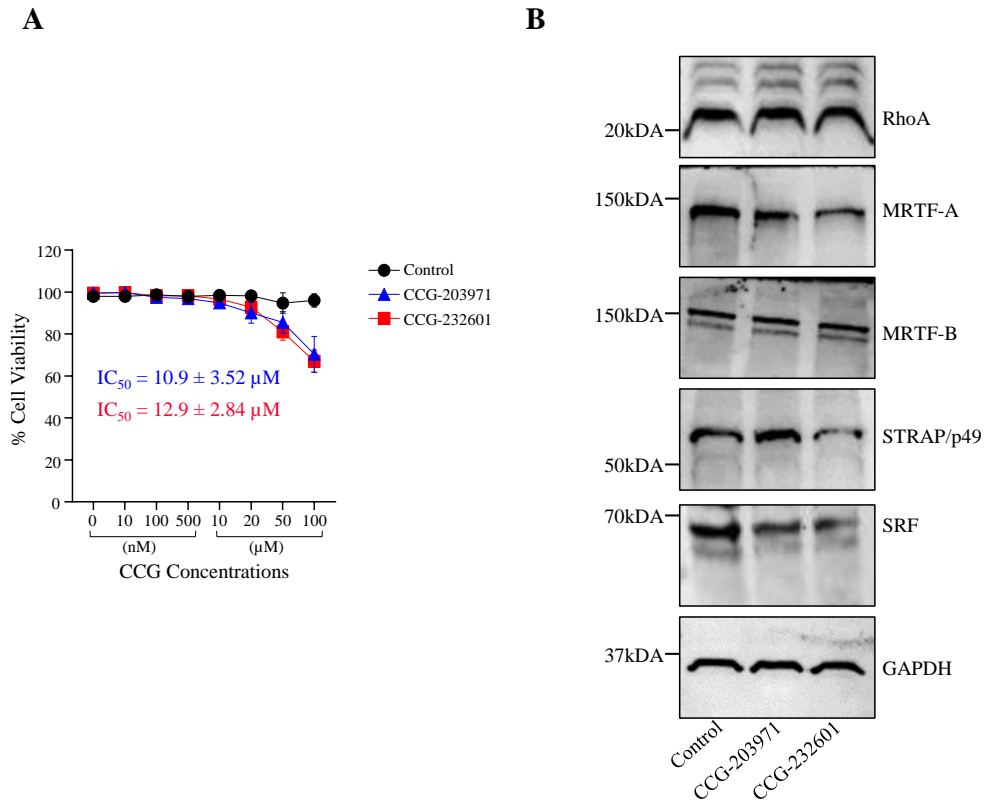

**Figure S1. Cellular viability and inhibition of Rho/MRTF/SRF signaling in mouse myoblast cells. (A)** MTS assay was performed on C2C12 cells treated with control and varying concentrations of CCG-203971 and CCG-232601 for 24h. Graphed values are shown as the mean ± SD ( $n = 4$ ) and the calculated IC<sub>50</sub> values are presented. **(B)** C2C12 cells were treated with 20 μM of CCG molecules for 24 h. Representative western blots show the protein expression of RhoA, MRTF-A, MRTF-B, STRAP/p49, and SRF; and GAPDH was used as a loading control.

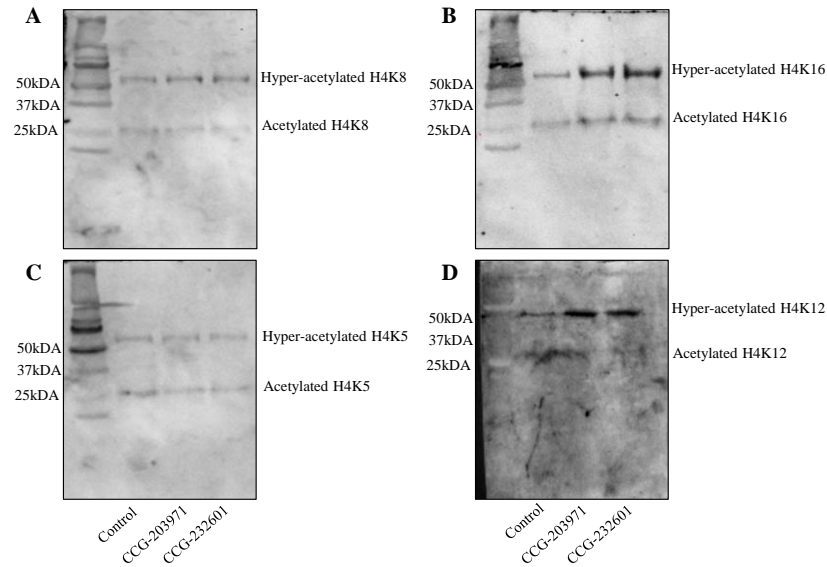

**Figure S2. Immunoblots from Figure 3 demonstrate hyper-acetylated and acetylated H4 Lysines.** WI-38 cells were treated with 20  $\mu$ M of CCG molecules for 24 h. Western blot analysis was used to examine the expression levels of histone H4 acetylation. Hyper-acetylated H4 lysines were observed at high molecular weight  $\sim$  50 kDA and acetylated H4 lysines were observed at low molecular weight  $\sim$  25 kDA. Western blot image for (A) H4K8ac (B) H4K16ac (C) H4K5ac (D) H4K12ac. No change in the expression levels of hyper-acetylated and acetylated H4K8 and H4K5 was observed, whereas H4K12 and H4K16 induced hyper-acetylation.

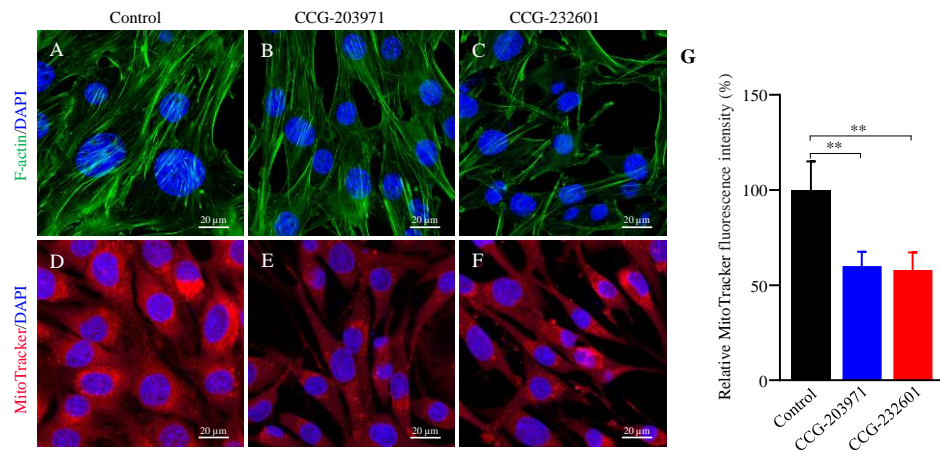

**Figure S3. Immunolabeling of F-actin and MitoTracker Red CMXRos in C2C12 cells.** C2C12 cells treated with 20  $\mu$ M CCG molecules for 24 h and stained with phalloidin (green) and MitoTracker Red CMXRos conjugated dyes. DAPI (blue) was used for nuclear counterstaining. (A, D) Control (0.5% DMSO treated) (B, E) CCG-203971 treated (C, F) CCG-232601 treated. A 63 $\times$  oil objective is used; scale bars indicate 20  $\mu$ m. Images are representative of 3 repeats. (G) Bar graphs show a significant reduction in MitoTracker Red fluorescence intensity (normalized) in treated cells to control. Data plotted as mean  $\pm$  SD. Data were pooled from 3 independent experiments (one-way ANOVA,  $**p < 0.01$ ).

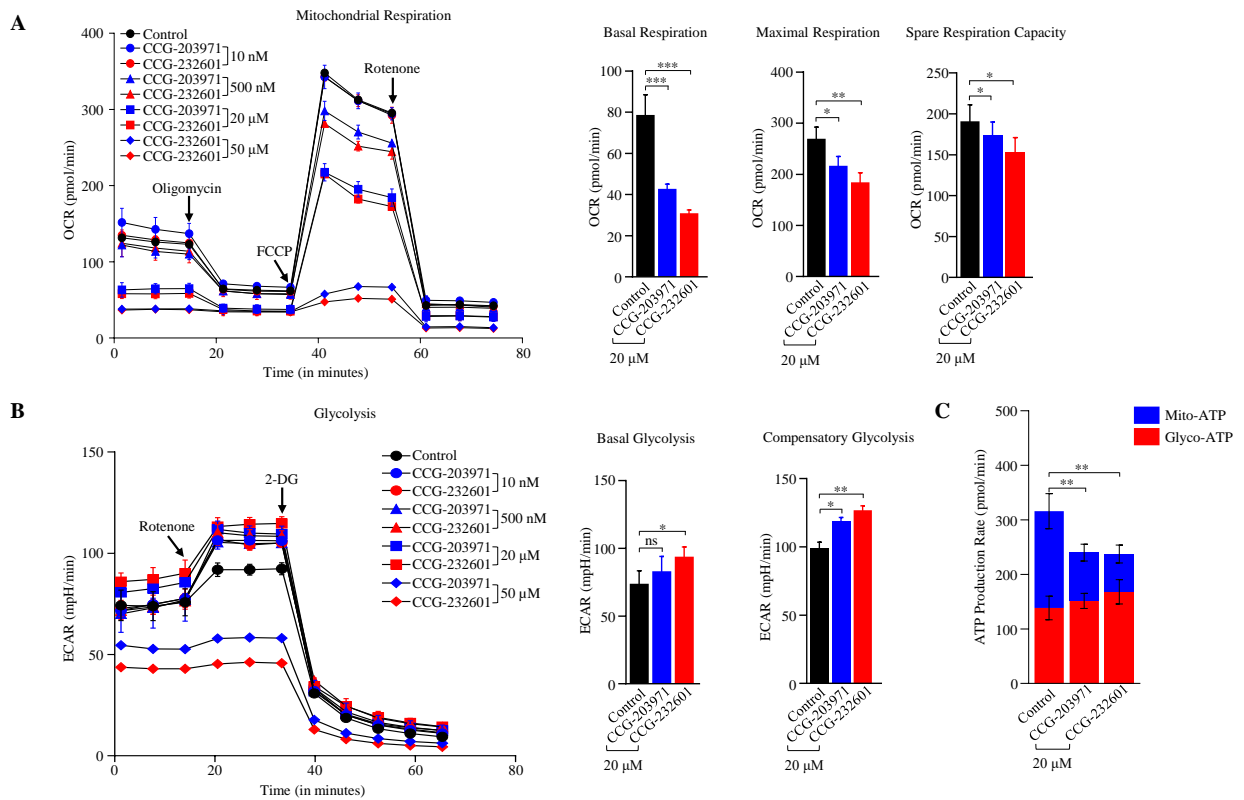

**Figure S4. Effect of CCG molecules on OCR and ECAR profiles in C2C12 cells.** C2C12 cells were treated with CCG-203971 and CCG-232601 at varying concentrations for 24 h (A) Seahorse XF Cell Mito Stress Test analysis of control (0.5% DMSO treated) and CCG-treated cells showing mean  $\pm$  SD normalized to equal number of cells. Graphs show the quantification of basal respiration, maximal respiration, and spare respiratory capacity (B) Glycolytic rate assay shown as mean  $\pm$  SD normalized to equal number of cells. Bar graphs show the calculated glycolytic parameters of basal and compensatory glycolysis. (C) ATP rate assay. There is reduction in total ATP production on treatment with CCG molecules, glyco-ATP increases while Mito-ATP decreases on the treatment. Error bars represent mean  $\pm$  SD ( $n = 3$ ). \* $p < 0.05$ ; \*\* $p < 0.01$ ; \*\*\* $p < 0.001$ , ns,  $p > 0.05$  by one-way ANOVA with Tukey's method.
